# Supplementary material for: A Humidity Sensor Based on Silver Nanoparticles Thin Film Prepared by Electrostatic Spray Deposition Process
Source: Hindawi journal article supplement (doi:10.1155/2013/640428), 2013-01-01
Supplement: f1 [file 640428.f1.docx]

**Supporting Information**

**A Humidity Sensor Based on Silver Nanoparticles Thin Film Prepared by Electrostatic Spray Deposition Process**

Thutiyaporn Thiwawong,1,2,3 Korakot Onlaor,1,2,3 and Benchapol Tunhoo1,2,3

1Electronics and Control System for Nanodevice Research Laboratory, College of Nanotechnology,

King Mongkut’s Institute of Technology Ladkrabang, Bangkok 10520, Thailand

2ThailandCenterofExcellenceinPhysics,CHE,328 Si AyutthayaRoad,Bangkok10400,Thailand

3Nanotec-KMITL Excellence Center on Nanoelectronic Devices, Bangkok 10520, Thailand

Correspondence should be addressed to Thutiyaporn Thiwawong; tthiwawong@gmail.com

To investigate the effect of moisture absorption to the structure of Ag NPs film, the energy-dispersive X-ray spectroscopy (EDS) and Raman spectroscopy measurements were used to analyze the composition of Ag NPs film before and after humidity cycling as shown in figure S1 and S2. Found that the amount of compositions in EDS spectra of Ag NPs film that are shown slightly fluctuation at after humidity cycling, which is consistent with the result of Raman spectroscopy.


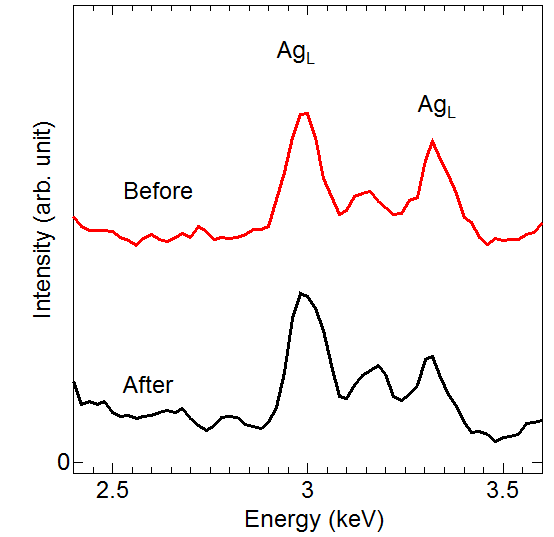


Figure S1: EDX spectra of Ag NPs films before and after humidity cycling (perform by Hitachi S-3400N).


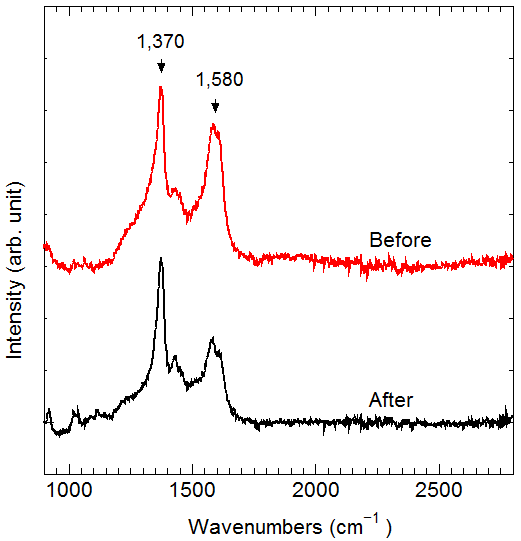


Figure S2: Raman spectra of Ag NPs films before and after humidity cycling (perform by Thermo scientific DXR smartraman).
